# Supplementary material
Source: publisher figshare collection journal article supplement (https://frontiersin.figshare.com/ndownloader/files/24038021)
Supplement: Supplementary file 1 [file 24038021]

## Supporting information

### **The influence of swelling on elastic properties of polyacrylamide hydrogels**

Ramesh Subramani <sup>1,2</sup>, Alicia Izquierdo-Alvarez <sup>3</sup>, Pinaki Bhattacharya <sup>3,4</sup>, Mathieu Meerts <sup>5</sup>, Paula Moldenaers <sup>5</sup>, Herman Ramon <sup>1</sup>, Hans Van Oosterwyck <sup>3,6 \*</sup>

**\* Correspondence:**

Hans Van Oosterwyck

[hans.vanoosterwyck@kuleuven.be](mailto:hans.vanoosterwyck@kuleuven.be)

#### **AFM and Swelling data as a function of time for soft and softest hydrogels (Short- term experiments)**

|     | Soft            |                    | Softest       |                    |
|-----|-----------------|--------------------|---------------|--------------------|
| Hrs | E (Pa)          | Swelling ratio (-) | E (Pa)        | Swelling ratio (-) |
| 0   | 1610.0 ± 199.23 | 18.3 ± 0.88        | 721.5 ± 106.6 | 15.0 ± 2.29        |
| 3   | 1454.0 ± 191.39 | 25.8 ± 1.58        | 400.0 ± 70.0  | 32.1 ± 5.16        |
| 6   | 1135.1 ± 63.83  | 27.4 ± 2.20        | 395.1 ± 73.99 | 39.5 ± 8.20        |
| 9   | 1175.2 ± 47.25  | 25.5 ± 1.45        | 294.7 ± 62.01 | 38.5 ± 8.11        |
| 12  | 1225.0 ± 98.55  | 25.3 ± 1.21        | 319.8 ± 89.89 | 40.3 ± 8.62        |
| 24  | 1166.7 ± 191.66 | 24.8 ± 1.18        | 320.1 ± 97.37 | 42.8 ± 11.0        |

**Table S1:** Mean ± standard deviation of elastic modulus and swelling ratio for soft and softest hydrogels as a function of each time point.
